# Supplementary material for: Preliminary characterization and antioxidant and hypoglycemic activities in vivo of polysaccharides from Huidouba
Source: Royal Society of Chemistry journal article supplement (doi:10.1039/c8fo01117f), 2018-01-01
Supplement: c8fo01117f1.pdf [file c8fo01117f1.pdf]

Table S1. Chemical shifts of resonances in the <sup>1</sup>H and <sup>13</sup>C NMR spectra of HDBP-1 and HDBP-2

| Sugar residue       | Chemical shift (ppm), δ |            |            |            |            |            |
|---------------------|-------------------------|------------|------------|------------|------------|------------|
|                     | C1/H1                   | C2/H2      | C3/H3      | C4/H4      | C5/H5      | C6/H6      |
| HDBP-1              |                         |            |            |            |            |            |
| →4)-α-D-Araf-(1→    | 107.92/5.17             | 81.13/4.12 | -/-        | 84.07/3.56 | 68.80/3.91 | -/-        |
| →6)-α-D-Galp-(1→    | 103.47/5.06             | 73.32/3.51 | 75.77/3.56 | 70.38/3.51 | 78.78/3.56 | 61.23/3.81 |
| β-D-Galp-(1→        | 102.32/4.78             | 70.99/3.76 | 71.52/4.12 | -/-        | 78.78/3.76 | 62.93/3.51 |
| →4)- β-D-Glcp-(1→   | 101.82/4.43             | 75.77/3.56 | 73.32/4.12 | 72.86/3.76 | 70.99/3.81 | 61.15/3.76 |
| →2)-α-L-Manp-(1→    | 98.57/5.9               | 75.77/4.12 | 69.43/3.81 | 68.8/3.54  | 71.52/3.01 | 60.85/3.91 |
| HDBP-2              |                         |            |            |            |            |            |
| →3,4)-α-D-Araf-(1→  | 109.36/5.19             | 81.50/4.21 | 76.57/4.00 | 83.07/4.06 | 62.73/3.58 | -/-        |
| →3)- β-L-Rhap-(1→   | 107.76/4.97             | 76.96/4.20 | 71.42/4.21 | 75.27/3.69 | 73.36/3.77 | 60.75/3.53 |
| →3)-α-D-Galp-(1→    | 103.65/5.10             | 73.36/3.39 | 77.38/3.46 | 71.52/3.48 | 78.11/3.49 | 62.73/3.69 |
| →6)- β-D- Galp -(1→ | 102.96/4.45             | 72.24/3.58 | 81.17/4.06 | 68.34/3.83 | 75.78/3.77 | 66.99/3.69 |
| →4)- β-D-Glcp-(1→   | 101.48/4.70             | 77.38/3.69 | 75.27/4.06 | 73.36/3.77 | 71.52/3.83 | 61.77/3.77 |
| α-L-Manp-(1→        | 100.16/5.02             | 75.78/4.21 | 70.90/3.83 | 68.82/3.58 | 72.24/3.69 | 62.73/3.58 |
